# Supplementary material
Source: PubMed Central journal article supplement (PMC10653885)
Supplement: mbio.02135-23-s0001.pdf [file mbio.02135-23-s0001.pdf]

## **Supplementary Materials for**

### **A unique borrelial protein facilitates microbial immune evasion**

Shelby D. Foor, Kalvis Brangulis, Anil K. Shakya, Vipin S. Rana, Sandhya Bista, Chrysoula Kitsou, Michael Ronzetti, Sara B. Linden, Amanda S. Altieri, Bolormaa Baljinnyam, Inara Akopjana, Daniel C. Nelson, Anton Simeonov, Osnat Herzberg, Melissa J. Caimano, Utpal Pal

Correspondence to: [upal@umd.edu](mailto:upal@umd.edu)

#### **This PDF file includes:**

**4 Supplementary Figures** (Figs. S1, S2, S3, and S4) and figure legends

**2 Supplementary Tables** (Table S1 and S2)

Figure S1

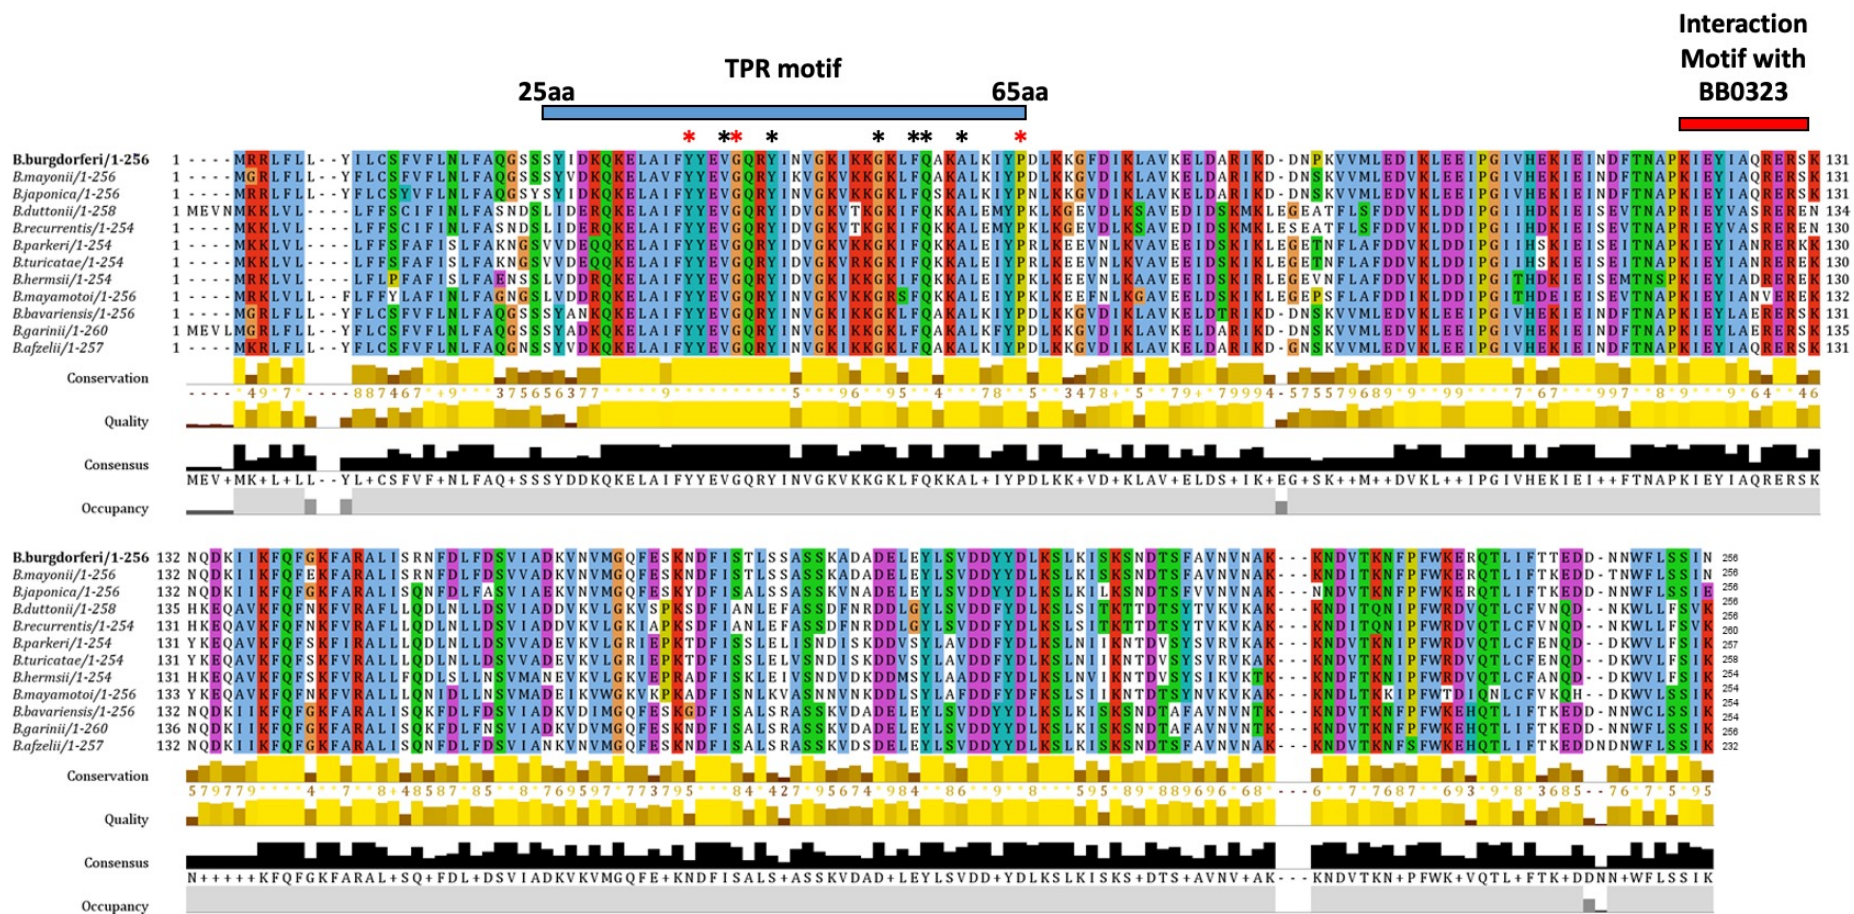

Figure S2

|                       | <b>rBB0238<sup>WT</sup></b><br><b>(%)</b> | <b>rY37A (%)</b> | <b>P65A (%)</b> |
|-----------------------|-------------------------------------------|------------------|-----------------|
| $\alpha$ -helix       | 32.1                                      | 32.1             | 32.0            |
| Anti-parallel $\beta$ | 9.5                                       | 11.0             | 10.3            |
| parallel $\beta$      | 8.7                                       | 8.3              | 8.5             |
| $\beta$ turn          | 17.1                                      | 17.5             | 17.3            |
| Random coil           | 32.7                                      | 30.0             | 31.5            |



Figure S4

Culture analysis of wild type and various *bb0238* mutants

| <b>Tissue</b> | <b><i>Bb</i><sup>BB0238-</sup></b> | <b><i>Bb</i><sup>BB0238+</sup></b> | <b><i>Bb</i><sup>Y37A</sup></b> | <b><i>Bb</i><sup>G41V</sup></b> | <b><i>Bb</i><sup>P65A</sup></b> |
|---------------|------------------------------------|------------------------------------|---------------------------------|---------------------------------|---------------------------------|
| <b>Joint</b>  | 0/3                                | <b>1/3</b>                         | 0/3                             | 0/3                             | 0/3                             |
| <b>Skin</b>   | 0/3                                | <b>2/3</b>                         | 0/3                             | 0/3                             | 0/3                             |
| <b>Heart</b>  | 0/3                                | 0/3                                | 0/3                             | 0/3                             | 0/3                             |

1 **Legends to Supplementary Figures**

2 **Fig. S1:** Conservation of BB0238 amino-acid sequence in various tick-borne borrelial pathogens.  
3 Protein alignment of BB0238 among *Borrelia* spp. via NCBI blast of the *B. burgdorferi* B31  
4 protein sequence identified homologs among the Spirochaetaceae order. Sequences used for  
5 BB0238 alignment include *B. burgdorferi* B31, *B. burgdorferi* Bol26, *B. mayonii*, *B. japonica*, *B.*  
6 *bavariensis*, *B. garinii* Far04, *B. afzelii* PKo, *B. duttonii* Ly, *B. recurrentis*, *B. parkeri*, *B.*  
7 *turicatae*, *B. hermsii*, *B. miyamotoi*, and *Spirochaeta cellobiosiphila*. Annotated above are the  
8 conserved TPR motif (25-65aa) and the interaction motif with BB0323 (120-131aa).

9 **Fig. S2:** Circular dichroism analysis. The recombinant wild type and TPR-like motif point  
10 mutants, rY37A and P65A, were examined by CD. The secondary structure deconvolution of the  
11 CD data (percent of total secondary structure) is displayed as estimated using the CDNN  
12 deconvolution program.

13 **Fig. S3:** BB0238 stabilization of BB0323 was depicted via a protein turnover assay at 33°C.  
14 Protein synthesis was inhibited via the addition of erythromycin to *B. burgdorferi* culture, and  
15 collected at 0, 4, 8, and 24 hr time points (depicted left to right in image). Protein was separated  
16 via SDS-PAGE and detected using antibody against FlaB (loading control), BB0238, and  
17 BB0323. Western images are representative of three individual experiments.

18 **Fig. S4:** Culture analysis. The organs collected from *Bb*<sup>WT</sup> and various *bb0238* TPR-like motif  
19 point mutants after transmission from infected ticks. Positive *B. burgdorferi* growth, as visible  
20 under darkfield microscopy, was determined within the joint, skin, or heart for all three mice per  
21 group after culturing in BSK II media at 34°C for two weeks post-collection.

22

23

24

**Table S1:** Mass Spectrometry-based identification of BB0238-interacting proteins

The average abundance ratio for *Bb*<sup>BB0238-</sup>: *Bb*<sup>WT</sup>, from two independent experiments were compared and narrowed to proteins with highest differences between two groups.

| Accession Number | Gene ID | Gene Description<br>[OS=Borrelia burgdorferi (strain ATCC 35210 / B31 / CIP 102532 / DSM 4680)] | Putative Function                                           | Putative Location                                     | Average Abundance Ratio:<br><i>Bb</i> <sup>BB0238-</sup> / <i>Bb</i> <sup>WT</sup> |
|------------------|---------|-------------------------------------------------------------------------------------------------|-------------------------------------------------------------|-------------------------------------------------------|------------------------------------------------------------------------------------|
| AAC66635.2       | BB_0238 | Uncharacterized protein                                                                         | BB0323 Processing                                           | <b>Periplasm</b>                                      | 0.007                                                                              |
| AAC66700.1       | BB_0323 | LysM domain protein                                                                             | Outer Membrane Stability                                    | <b>Periplasm</b>                                      | 0.164                                                                              |
| AAC66497.1       | BB_0108 | Basic membrane protein                                                                          | Putative SurA/PrsA Chaperone                                | <b>Periplasm</b>                                      | 0.872                                                                              |
| AAC66887.1       | BB_0518 | Chaperone protein DnaK                                                                          | ATP-dependent Hsp70 protein homolog                         | Protoplasm                                            | 0.316                                                                              |
| AAC66919.2       | BB_0560 | Chaperone protein HtpG                                                                          | ATP-dependent Hsp90 protein homolog                         | Protoplasm                                            | 0.252                                                                              |
| AAC66965.1       | BB_0610 | Trigger factor                                                                                  | Ribosome associated, ATP-independent chaperone              | Protoplasm                                            | 0.242                                                                              |
| AAC66323.1       | BB_B05  | Chitibiose transporter protein chbA                                                             | Carbohydrate transport system subunit                       | Plasma membrane                                       | 0.338                                                                              |
| AAC66627.1       | BB_0243 | Glycerol-3-phosphate dehydrogenase, anaerobic                                                   | Glycolysis; Host-protein interaction/virulence factor       | Protoplasm/surface or secreted (moonlighting protein) | 0.317                                                                              |
| AAC66539.1       | BB_0151 | N-acetylglucosamine-6-phosphate deacetylase                                                     | Biosynthesis pathway of amino-sugar-nucleotides; glycolysis | Protoplasm                                            | 0.221                                                                              |
| AAC66511.1       | BB_0123 | 30S ribosomal protein S2                                                                        | Protein synthesis                                           | Protoplasm                                            | 0.411                                                                              |
| AAC66431.1       | BB_0052 | tRNA (guanosine(18)-2'-O)-methyltransferase                                                     | Protein synthesis                                           | Protoplasm                                            | 0.271                                                                              |
| AAC66731.1       | BB_0355 | Transcription factor, putative                                                                  | CarD-like family transcriptional regulator                  | Protoplasm                                            | 0.397                                                                              |

**Table S2:** Oligonucleotide primers used in the current study

| <b>Primer Name/Purpose</b>                                                                                                                       | <b>Sequence 5' – 3'</b>                          |
|--------------------------------------------------------------------------------------------------------------------------------------------------|--------------------------------------------------|
| BB0238 protein expression (pET302) forward primer (EcoRI site italicized)                                                                        | AATGAATTCCAAGGTAGTTCTTCTTATA<br>T                |
| BB0238 protein expression (pET302) reverse primer (XhoI site italicized)                                                                         | CCGCTCGAGTCAATTTATGGAAGACAA<br>AAACCA            |
| G41V Forward Point Mutagenesis of pET302::BB0238                                                                                                 | TTTTATTATGAGGTTGTTCAAAGATATA<br>TAAAC            |
| G41V Reverse Point Mutagenesis of pET302::BB0238                                                                                                 | TATATTGATAAGCAAAAAGAGCTTGCT<br>ATT               |
| Y37A Forward Point Mutagenesis of pET302::BB0238                                                                                                 | CTTGCTATTTTTGCTTATGAGGTTGGTC<br>A                |
| Y37A Reverse Point Mutagenesis of pET302::BB0238                                                                                                 | CAAGGTAGTTCTTCTTATATTGATAAGC<br>AAAAAGAG         |
| P65A Forward Point Mutagenesis of pET302::BB0238                                                                                                 | GCTTTAAAGATTTATGCAGATTTGAAA<br>AAGGGG            |
| P65A Reverse Point Mutagenesis of pET302::BB0238                                                                                                 | ATTAAAAAAGGAAAGCTTTTTCAAGCA<br>AAA               |
| OspC Expression Forward Primer (pET28a and pGex 6P-1) (BamHI site italicized)                                                                    | ATAGGATCCTGTAATAATTCAGGGAAA<br>GAT               |
| OspC Expression Reverse Primer (pET28a and pGex 6P-1) (XhoI site italicized)                                                                     | ATATCTCGAGTTAAGGTTTTTTTTGGACT<br>TTC             |
| BB0108 Expression Forward Primer (pET302 and pGex 6P-1) (EcoRI site italicized)                                                                  | ATATGAATTCTTTTGGGTAATATTGGGA                     |
| BB0108 Expression Reverse Primer (pET302 and pGex 6P-1) (XhoI site italicized)                                                                   | TTAGCTCGAGTTATTTTAGACTAGAATC                     |
| Forward primer for PCR amplification of BB0238 <sub>24-256</sub> and BB0238 <sub>24-114</sub> (NcoI site italicized)                             | CATGCCATGGGCTCTTCTTATATTGATA<br>AG               |
| Reverse primer for PCR amplification of BB0238 <sub>24-256</sub> ; BB0238 <sub>53-256</sub> and BB0238 <sub>118-256</sub> (NotI site italicized) | GCTTGCGGCCGCTTAATTTATGGAAGA<br>CAAAA             |
| Forward primer for PCR amplification of BB0238 <sub>53-256</sub> (NcoI site italicized)                                                          | CATGCCATGGGCGGAAAGCTTTTTCAAG<br>CA               |
| Forward primer for PCR amplification of BB0238 <sub>118-256</sub> (NcoI site italicized)                                                         | CATGCCATGGGCGCTCCTAAAATAGAA<br>TAT               |
| Reverse primer for PCR amplification of BB0238 <sub>24-114</sub> (NotI site italicized)                                                          | GCTTGCGGCCGCTTAATCATTGATTCT<br>ATTTT             |
| Forward primer for Site-directed mutagenesis for production of BB0238 <sub>118-256</sub> Leu240Met                                               | GAACGTCAAACACTATGATTTTTACTACA<br>GAGGATGATAATAAT |
| Reverse primer for Site-directed mutagenesis for production of BB0238 <sub>118-256</sub> Leu240Met                                               | TGTAGTAAAAATCATAGTTTGACGTTCT<br>TTCCAAAATGGAAA   |
